# Supplementary material
Source: PubMed Central journal article supplement (PMC4703272)
Supplement: SD11.pdf [file SD11.pdf]

SUPPLEMENTAL APPENDIX 1: QUESTIONNAIRE ADMINISTERED AT BILL & MELINDA GATES  
FOUNDATION MEETING

1. Please assume for this survey that programs distribute oral azithromycin twice annually for 3 years, as a single dose (20 mg/kg), and that 80% of children aged 6 months to 9 years are treated. Treatment is given in a rural community in sub-Saharan Africa.
- a. What do you believe to be the true effect of azithromycin treatment on childhood mortality, relative to placebo?  
Please place an X in the box above the appropriate number.

| Mortality reduction with azithromycin |      |      |      |      |      |      |      |      |      |      | No difference |      |     | Mortality increase with azithromycin |     |      |      |      |      |      |      |      |      |      |      |      |      |      |
|---------------------------------------|------|------|------|------|------|------|------|------|------|------|---------------|------|-----|--------------------------------------|-----|------|------|------|------|------|------|------|------|------|------|------|------|------|
| -70%                                  | -65% | -60% | -55% | -50% | -45% | -40% | -35% | -30% | -25% | -20% | -15%          | -10% | -5% | 0%                                   | +5% | +10% | +15% | +20% | +25% | +30% | +35% | +40% | +45% | +50% | +55% | +60% | +65% | +70% |

- b. What is the BEST effect of azithromycin that you would consider plausible\* (i.e., only 2.5% probability that the truth is better than this value)?

Please place a B for BEST in the box above the appropriate number.

- c. What is the WORST effect of azithromycin that you would consider plausible\* (i.e., only 2.5% probability that the truth is worse than this value)?

Please place a W for WORST in the box above the appropriate number.

\* We are attempting to elicit your Bayesian 95% credible interval.

2. If azithromycin does reduce childhood mortality, please rank the importance of the following mechanisms in producing this effect. One means the most important and five the least important

| Mechanism of mortality reduction | Most important |   |   | Least important |   |
|----------------------------------|----------------|---|---|-----------------|---|
| Malaria                          | 1              | 2 | 3 | 4               | 5 |
| Diarrhea                         | 1              | 2 | 3 | 4               | 5 |
| Respiratory Infection            | 1              | 2 | 3 | 4               | 5 |
| Noninfectious causes             | 1              | 2 | 3 | 4               | 5 |
| Other infectious cause           | 1              | 2 | 3 | 4               | 5 |

3. If studies CONFIRM a mortality reduction with azithromycin, how interested are you in the effect of azithromycin on morbidity (malaria, diarrhea, respiratory disease, wasting, etc.)?

Uninterested     
  Mildly interested     
  Interested     
  Strongly interested

4. If studies FAIL TO CONFIRM a mortality reduction with azithromycin, how interested are you in the effect of azithromycin on morbidity (malaria, diarrhea, respiratory disease, wasting, etc.)?

Uninterested     
  Mildly interested     
  Interested     
  Strongly interested
